# Supplementary material for: Molecular tectonics: tetracarboxythiacalix[4]arene derivatives as tectons for the formation of hydrogen-bonded networks
Source: Royal Society of Chemistry journal article supplement (doi:10.1039/c6ce02026g), 2016-01-01
Supplement: c6ce02026g1.pdf [file c6ce02026g1.pdf]

Electronic Supplementary Information

## Molecular tectonics: tetracarboxythiacalix[4]arene derivatives as tectons for the formation of hydrogen-bonded networks

A. S. Ovsyannikov,<sup>b,c</sup> M. N. Lang,<sup>a</sup> S. Ferlay,<sup>\*a</sup> S. E. Solovieva,<sup>\*b,c</sup> I. S. Antipin,<sup>\*b,c</sup> A. I. Konovalov,<sup>b,c</sup> N. Kyritsakas,<sup>a</sup> M. W. Hosseini<sup>\*a</sup>

**Table S1.** Yields of esters **4'**-**8'** and corresponding acids **4**-**8** based on TCA and TMTCA.

| Compound  | X | R               | R' | Spacer                                                                               | Yield, % |
|-----------|---|-----------------|----|--------------------------------------------------------------------------------------|----------|
| <b>4'</b> | S | <i>tert</i> -Bu | Et | -                                                                                    | 46       |
| <b>5'</b> | S | <i>tert</i> -Bu | Et | -(CH <sub>2</sub> ) <sub>2</sub> -                                                   | 60       |
| <b>6'</b> | O | <i>tert</i> -Bu | Et | -(CH <sub>2</sub> ) <sub>2</sub> -                                                   | 46       |
| <b>7'</b> | S | <i>tert</i> -Bu | Me | 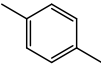   | 57       |
| <b>8'</b> | O | H               | Me |  | 63       |
| <b>4</b>  | S | <i>tert</i> -Bu | Et | -                                                                                    | 92       |
| <b>5</b>  | S | <i>tert</i> -Bu | Et | -(CH <sub>2</sub> ) <sub>2</sub> -                                                   | 95       |
| <b>6</b>  | O | <i>tert</i> -Bu | Et | -(CH <sub>2</sub> ) <sub>2</sub> -                                                   | 95       |
| <b>7</b>  | S | <i>tert</i> -Bu | Me |  | 92       |
| <b>8</b>  | O | H               | Me |  | 94       |

**Table S2:** Distances and angles for compounds **4-7** obtained by X-ray diffraction on single crystals.

|                   | <b>4</b>              | <b>5</b>                                                                                         | <b>6</b>                                                                                         | <b>7</b>                                                                                         |
|-------------------|-----------------------|--------------------------------------------------------------------------------------------------|--------------------------------------------------------------------------------------------------|--------------------------------------------------------------------------------------------------|
| S-C(Ar) bridge    | 1.783(2)<br>1.785(2)  | 1.777(3)<br>1.779(3)<br>1.781(3)<br>1.784(3)                                                     | 1.762(6)<br>1.763(5)<br>1.767(5)<br>1.770(5)<br>1.771(5)<br>1.776(5)<br>1.778(6)<br>1.780(5)     | 1.768(2)<br>1.774(2)<br>1.777(2)<br>1.779(2)<br>1.783(2)<br>1.785(2)                             |
| O(S)-Ar           | 1.774(2)              | 1.773(3)<br>1.773(2)<br>1.765(3)<br>1.773(3)                                                     | 1.371(6)<br>1.377(6)<br>1.379(5)<br>1.388(6)                                                     | 1.764(2)<br>1.765(2)<br>1.769(2)<br>1.7711(19)                                                   |
| C-O (carboxylate) | 1.234(5) and 1.256(5) | 1.215(4) and 1.315(4)<br>1.212(5) and 1.275(5)<br>1.227(4) and 1.288(4)<br>1.224(4) and 1.299(4) | 1.209(8) and 1.316(7)<br>1.202(8) and 1.320(7)<br>1.221(7) and 1.316(7)<br>1.203(7) and 1.303(8) | 1.248(3) and 1.265(3)<br>1.241(4) and 1.255(4)<br>1.250(3) and 1.262(3)<br>1.255(4) and 1.265(4) |
| O---O (H bond)    | -                     | 2.613(4)<br>2.691(5)<br>2.682(5)<br>2.686(5)                                                     | 2.676(7)<br>2.631(7)<br>2.740(7)<br>2.673(7)                                                     | 2.579(4)<br>2.597(5)<br>2.617(4)<br>2.675(4)                                                     |

**Table S3:** Distances and angles for compounds  $[7^4-(A^{2+})_2]$ ,  $[8^4-(A^{2+})_2]$ ,  $[5^2-A^{2+}]$  and  $[(4^3)_2-(A^{2+})_3]$ .

|                   | $[7^4-(A^{2+})_2]$                               | $[8^4-(A^{2+})_2]$                                                                                                                                                                                                   | $[(4^3)_2-(A^{2+})_3]$                                                                           | $[5^2-A^{2+}]$                                                                                     |
|-------------------|--------------------------------------------------|----------------------------------------------------------------------------------------------------------------------------------------------------------------------------------------------------------------------|--------------------------------------------------------------------------------------------------|----------------------------------------------------------------------------------------------------|
| S-C(Ar) bridge    | 1.765(5)                                         | 1.745(11)<br>1.759(12)<br>1.765(9)<br>1.774(10)<br>1.775(9)<br>1.776(11)<br>1.781(11)<br>1.782(9)<br>1.788(10)<br>1.789(9)<br>1.789(10)<br>1.789(11)<br>1.797(11)<br>1.798(10)                                       | 1.770(5)<br>1.772(5)<br>1.776(6)<br>1.777(5)<br>1.778(5)<br>1.782(6)<br>1.783(5)<br>1.784(5)     | 1.770(5)<br>1.771(5)<br>1.764(5)<br>1.776(5)<br>1.777(5)<br>1.780(5)<br>1.789(5)                   |
| O(S)-Ar           | 1.772(5)<br>1.778(5)                             | 1.339(11)<br>1.359(10)<br>1.359(11)<br>1.387(12)<br>1.390(11)<br>1.362(11)<br>1.401(11)<br>1.439(11)                                                                                                                 | 1.773(4)<br>1.773(5)<br>1.760(5)<br>1.761(5)                                                     | 1.770(5)<br>1.771(5)<br>1.773(5)<br>1.766(5)                                                       |
| C-O (carboxylate) | 1.258(11) and 1.301(12)<br>1.218(7) and 1.263(7) | 1.245(13) and 1.256(12)<br>1.201(14) and 1.219(12)<br>1.229(12) and 1.266(12)<br>1.223(13) and 1.284(13)<br>1.251(13) and 1.255(13)<br>1.243(15) and 1.277(15)<br>1.252(13) and 1.259(13)<br>1.247(12) and 1.258(13) | 1.201(9) and 1.237(9)<br>1.227(6) and 1.277(6)<br>1.188(8) and 1.242(9)<br>1.187(9) and 1.291(8) | 1.211(9) and 1.266(8)<br>1.210(11) and 1.295(11)<br>1.219(8) and 1.291(8)<br>1.204(9) and 1.316(8) |
| O...O (H bond)    | -                                                | -                                                                                                                                                                                                                    | -                                                                                                | 2.481(9)<br>2.508(7)<br>2.685(10) (MeOH)                                                           |
| O...N (H bond)    | 2.761(16)<br>2.769(8)<br>2.792(10)<br>2.779(13)  | 2.625(15)<br>2.705(11)<br>2.709(12)<br>2.724(15)<br>2.725(12)<br>2.734(15)<br>2.748(11)<br>2.764(8)<br>2.790(11)<br>2.781(11)<br>2.823(12)<br>2.850(14)<br>2.856(11)<br>2.878(11)<br>2.816(13)                       | 2.669(10)<br>2.675(6)<br>2.713(8)<br>2.731(6)<br>2.799(8)<br>2.818(10)                           | 2.725(8)<br>2.791(7)<br>2.815(10)<br>2.780(11) (MeOH)                                              |

**Table S4** : Crystallographic Parameters for **4**, **5**, **6** and **7** recorded at 173 K.

| Formula                                              | <b>4</b><br>C <sub>48</sub> H <sub>56</sub> O <sub>8</sub> S <sub>8</sub> , 4(C <sub>3</sub> H <sub>7</sub> NO) | <b>5</b><br>C <sub>56</sub> H <sub>72</sub> O <sub>8</sub> S <sub>8</sub> | <b>6</b><br>C <sub>56</sub> H <sub>72</sub> O <sub>12</sub> S <sub>4</sub> , CHCl <sub>3</sub> | <b>7</b><br>(C <sub>72</sub> H <sub>72</sub> O <sub>8</sub> S <sub>8</sub> ) <sub>2</sub> ·CH <sub>2</sub> Cl <sub>2</sub> ·2(H <sub>2</sub> O) |
|------------------------------------------------------|-----------------------------------------------------------------------------------------------------------------|---------------------------------------------------------------------------|------------------------------------------------------------------------------------------------|-------------------------------------------------------------------------------------------------------------------------------------------------|
| Molecular weight                                     | 1309.79                                                                                                         | 1129.62                                                                   | 1184.74                                                                                        | 1305.78                                                                                                                                         |
| Crystal system                                       | Tetragonal                                                                                                      | Triclinic                                                                 | Monoclinic                                                                                     | Triclinic                                                                                                                                       |
| Space group                                          | P4 <sub>2</sub> /n                                                                                              | P -1                                                                      | P 2 <sub>1</sub> /c                                                                            | P -1                                                                                                                                            |
| a(Å)                                                 | 16.6796(2)                                                                                                      | 12.7393(3)                                                                | 15.1566(9)                                                                                     | 12.2472(3)                                                                                                                                      |
| b(Å)                                                 | 16.6796(2)                                                                                                      | 15.3611(3)                                                                | 13.6474(7)                                                                                     | 15.6106(4)                                                                                                                                      |
| c(Å)                                                 | 11.9659(2)                                                                                                      | 17.4026(4)                                                                | 28.4065(19)                                                                                    | 20.6330(6)                                                                                                                                      |
| α(deg)                                               | 90                                                                                                              | 64.3010(10)                                                               | 90                                                                                             | 92.390(2)                                                                                                                                       |
| β(deg)                                               | 90                                                                                                              | 82.0540(10)                                                               | 92.503(2)                                                                                      | 96.8950(10)                                                                                                                                     |
| γ(deg)                                               | 90                                                                                                              | 80.5920(10)                                                               | 90                                                                                             | 96.8010(10)                                                                                                                                     |
| V(Å <sup>3</sup> )                                   | 3329.02(8)                                                                                                      | 3018.68(12)                                                               | 5870.2(6)                                                                                      | 3882.40(18)                                                                                                                                     |
| Z                                                    | 1                                                                                                               | 2                                                                         | 4                                                                                              | 1                                                                                                                                               |
| Colour                                               | colourless                                                                                                      | colourless                                                                | colourless                                                                                     | colourless                                                                                                                                      |
| Crystal dim (mm <sup>3</sup> )                       | 0.09 x 0.07 x 0.05                                                                                              | 0.06 x 0.06 x 0.06                                                        | 0.18 x 0.16 x 0.15                                                                             | 0.060 x 0.060 x 0.070                                                                                                                           |
| Dcalc (gcm <sup>-3</sup> )                           | 1.307                                                                                                           | 1.243                                                                     | 1.341                                                                                          | 1.182                                                                                                                                           |
| F(000)                                               | 1392                                                                                                            | 1200                                                                      | 2504                                                                                           | 1454                                                                                                                                            |
| μ (mm <sup>-1</sup> )                                | 0.328                                                                                                           | 0.345                                                                     | 0.358                                                                                          | 0.315                                                                                                                                           |
| Wavelength (Å)                                       | 0.71073                                                                                                         | 0.71073                                                                   | 0.71073                                                                                        | 0.71073                                                                                                                                         |
| Number of data meas.                                 | 53158                                                                                                           | 59926                                                                     | 44397                                                                                          | 21001                                                                                                                                           |
| Number of data with I > 2σ(I)                        | 4848 [R(int) = 0.0445]                                                                                          | 16333 [R(int) = 0.0788]                                                   | 13150 [R(int) = 0.0602]                                                                        | 15259 [R(int) = 0.0273]                                                                                                                         |
| R                                                    | R1 = 0.0523, wR2 = 0.1536                                                                                       | R1 = 0.0573, wR2 = 0.1300                                                 | R1 = 0.0943, wR2 = 0.2132                                                                      | R1 = 0.0616, wR2 = 0.1956                                                                                                                       |
| Rw                                                   | R1 = 0.0743, wR2 = 0.1763                                                                                       | R1 = 0.1074, wR2 = 0.1552                                                 | R1 = 0.1787, wR2 = 0.2653                                                                      | R1 = 0.0854, wR2 = 0.2153                                                                                                                       |
| GOF                                                  | 1.052                                                                                                           | 1.030                                                                     | 1.043                                                                                          | 1.105                                                                                                                                           |
| Largest peak in final difference (eÅ <sup>-3</sup> ) | 0.787 and -0.551                                                                                                | 0.832 and -0.542                                                          | 0.501 and -0.436                                                                               | 1.296 and -0.693                                                                                                                                |

**Table S5** : Crystallographic Parameters for **[7<sup>4-</sup>-(A<sup>2+</sup>)<sub>2</sub>]**, **[8<sup>4-</sup>-(A<sup>2+</sup>)<sub>2</sub>]**, **[5<sup>2-</sup>-A<sup>2+</sup>]** and **[(4<sup>3-</sup>)<sub>2</sub>-(A<sup>2+</sup>)<sub>3</sub>]** recorded at 173 K.

| Formula                                              | <b>[7<sup>4-</sup>-(A<sup>2+</sup>)<sub>2</sub>]</b><br>C <sub>72</sub> H <sub>68</sub> O <sub>8</sub> S <sub>8</sub> (C <sub>10</sub> H <sub>20</sub> N <sub>4</sub> ) <sub>2</sub> ·2(H <sub>2</sub> O) | <b>[8<sup>4-</sup>-(A<sup>2+</sup>)<sub>2</sub>]</b><br>C <sub>56</sub> H <sub>36</sub> O <sub>12</sub> S <sub>4</sub> (C <sub>10</sub> H <sub>20</sub> N <sub>4</sub> ) <sub>2</sub> | <b>[(4<sup>3-</sup>)<sub>2</sub>-(A<sup>2+</sup>)<sub>3</sub>]</b><br>(C <sub>48</sub> H <sub>53</sub> O <sub>8</sub> S <sub>8</sub> ) <sub>2</sub> (C <sub>10</sub> H <sub>20</sub> N <sub>4</sub> ) <sub>3</sub> ·4(C <sub>3</sub> H <sub>7</sub> NO), H <sub>2</sub> O | <b>[5<sup>2-</sup>-A<sup>2+</sup>]</b><br>(C <sub>56</sub> H <sub>72</sub> O <sub>8</sub> S <sub>8</sub> ) <sub>2</sub> ·(C <sub>10</sub> H <sub>20</sub> N <sub>4</sub> ) <sub>2</sub> ·CH <sub>3</sub> OH·H <sub>2</sub> O |
|------------------------------------------------------|-----------------------------------------------------------------------------------------------------------------------------------------------------------------------------------------------------------|---------------------------------------------------------------------------------------------------------------------------------------------------------------------------------------|---------------------------------------------------------------------------------------------------------------------------------------------------------------------------------------------------------------------------------------------------------------------------|------------------------------------------------------------------------------------------------------------------------------------------------------------------------------------------------------------------------------|
| Molecular weight                                     | 1746.37                                                                                                                                                                                                   | 1421.68                                                                                                                                                                               | 2928.06                                                                                                                                                                                                                                                                   | 2699.86                                                                                                                                                                                                                      |
| Crystal system                                       | Monoclinic                                                                                                                                                                                                | Orthorhombic                                                                                                                                                                          | Monoclinic                                                                                                                                                                                                                                                                | Monoclinic                                                                                                                                                                                                                   |
| Space group                                          | P 2 <sub>1</sub> /n                                                                                                                                                                                       | P 2 <sub>1</sub> 2 <sub>1</sub> 2 <sub>1</sub>                                                                                                                                        | C 2 <sub>1</sub> /c                                                                                                                                                                                                                                                       | C 2                                                                                                                                                                                                                          |
| a(Å)                                                 | 11.0804(5)                                                                                                                                                                                                | 40.449(10)                                                                                                                                                                            | 41.2998(17)                                                                                                                                                                                                                                                               | 33.2961(10)                                                                                                                                                                                                                  |
| b(Å)                                                 | 22.8508(10)                                                                                                                                                                                               | 10.2346(17)                                                                                                                                                                           | 16.5977(7)                                                                                                                                                                                                                                                                | 11.7323(3)                                                                                                                                                                                                                   |
| c(Å)                                                 | 19.1244(6)                                                                                                                                                                                                | 33.844(8)                                                                                                                                                                             | 29.4977(11)                                                                                                                                                                                                                                                               | 20.7114(5)                                                                                                                                                                                                                   |
| α(deg)                                               | 90                                                                                                                                                                                                        | 90                                                                                                                                                                                    | 90                                                                                                                                                                                                                                                                        | 90                                                                                                                                                                                                                           |
| β(deg)                                               | 105.7270(10)                                                                                                                                                                                              | 90                                                                                                                                                                                    | 125.5250(10)                                                                                                                                                                                                                                                              | 114.1140(10)                                                                                                                                                                                                                 |
| γ(deg)                                               | 90                                                                                                                                                                                                        | 90                                                                                                                                                                                    | 90                                                                                                                                                                                                                                                                        | 90                                                                                                                                                                                                                           |
| V(Å <sup>3</sup> )                                   | 4660.9(3)                                                                                                                                                                                                 | 14011(5)                                                                                                                                                                              | 16456.4(12)                                                                                                                                                                                                                                                               | 7384.7(3)                                                                                                                                                                                                                    |
| Z                                                    | 2                                                                                                                                                                                                         | 8                                                                                                                                                                                     | 4                                                                                                                                                                                                                                                                         | 2                                                                                                                                                                                                                            |
| Colour                                               | colourless                                                                                                                                                                                                | colourless                                                                                                                                                                            | colourless                                                                                                                                                                                                                                                                | colourless                                                                                                                                                                                                                   |
| Crystal dim (mm <sup>3</sup> )                       | 0.040 x 0.040 x 0.050                                                                                                                                                                                     | 0.050 x 0.050 x 0.070                                                                                                                                                                 | 0.060 x 0.060 x 0.070                                                                                                                                                                                                                                                     | 0.050 x 0.050 x 0.060                                                                                                                                                                                                        |
| Dcalc (gcm <sup>-3</sup> )                           | 1.244                                                                                                                                                                                                     | 1.348                                                                                                                                                                                 | 1.182                                                                                                                                                                                                                                                                     | 1.214                                                                                                                                                                                                                        |
| F(000)                                               | 1856                                                                                                                                                                                                      | 5984                                                                                                                                                                                  | 6240                                                                                                                                                                                                                                                                      | 2884                                                                                                                                                                                                                         |
| μ (mm <sup>-1</sup> )                                | 0.252                                                                                                                                                                                                     | 0.205                                                                                                                                                                                 | 0.273                                                                                                                                                                                                                                                                     | 0.295                                                                                                                                                                                                                        |
| Wavelength (Å)                                       | 0.71073                                                                                                                                                                                                   | 0.71073                                                                                                                                                                               | 0.71073                                                                                                                                                                                                                                                                   | 0.71073                                                                                                                                                                                                                      |
| Number of data meas.                                 | 12703                                                                                                                                                                                                     | 54087                                                                                                                                                                                 | 67396                                                                                                                                                                                                                                                                     | 79125                                                                                                                                                                                                                        |
| Number of data with I > 2σ(I)                        | 5992 [R(int) = 0.0882]                                                                                                                                                                                    | 31211 [R(int) = 0.1215]                                                                                                                                                               | 23231 [R(int) = 0.0797]                                                                                                                                                                                                                                                   | 20081 [R(int) = 0.0451]                                                                                                                                                                                                      |
| R                                                    | R1 = 0.1264, wR2 = 0.2812                                                                                                                                                                                 | R1 = 0.0887, wR2 = 0.1599                                                                                                                                                             | R1 = 0.1084, wR2 = 0.2986                                                                                                                                                                                                                                                 | R1 = 0.0660, wR2 = 0.1821                                                                                                                                                                                                    |
| Rw                                                   | R1 = 0.2288, wR2 = 0.3383                                                                                                                                                                                 | R1 = 0.2248, wR2 = 0.1925                                                                                                                                                             | R1 = 0.2029, wR2 = 0.3609                                                                                                                                                                                                                                                 | R1 = 0.0951, wR2 = 0.2051                                                                                                                                                                                                    |
| GOF                                                  | 1.019                                                                                                                                                                                                     | 1.026                                                                                                                                                                                 | 1.045                                                                                                                                                                                                                                                                     | 1.021                                                                                                                                                                                                                        |
| Largest peak in final difference (eÅ <sup>-3</sup> ) | 1.426 and -0.844                                                                                                                                                                                          | 1.173 and -0.705                                                                                                                                                                      | 1.678 and -0.636                                                                                                                                                                                                                                                          | 1.617 and -0.477                                                                                                                                                                                                             |
